# Supplementary material for: 3D Printed SiOC(N) Ceramic Scaffolds for Bone Tissue Regeneration: Improved Osteogenic Differentiation of Human Bone Marrow-Derived Mesenchymal Stem Cells
Source: MDPI journal article supplement (doi:10.3390/ijms222413676), 2021-12-20
Supplement: s1 [file s1]

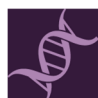

## Supplementary Materials

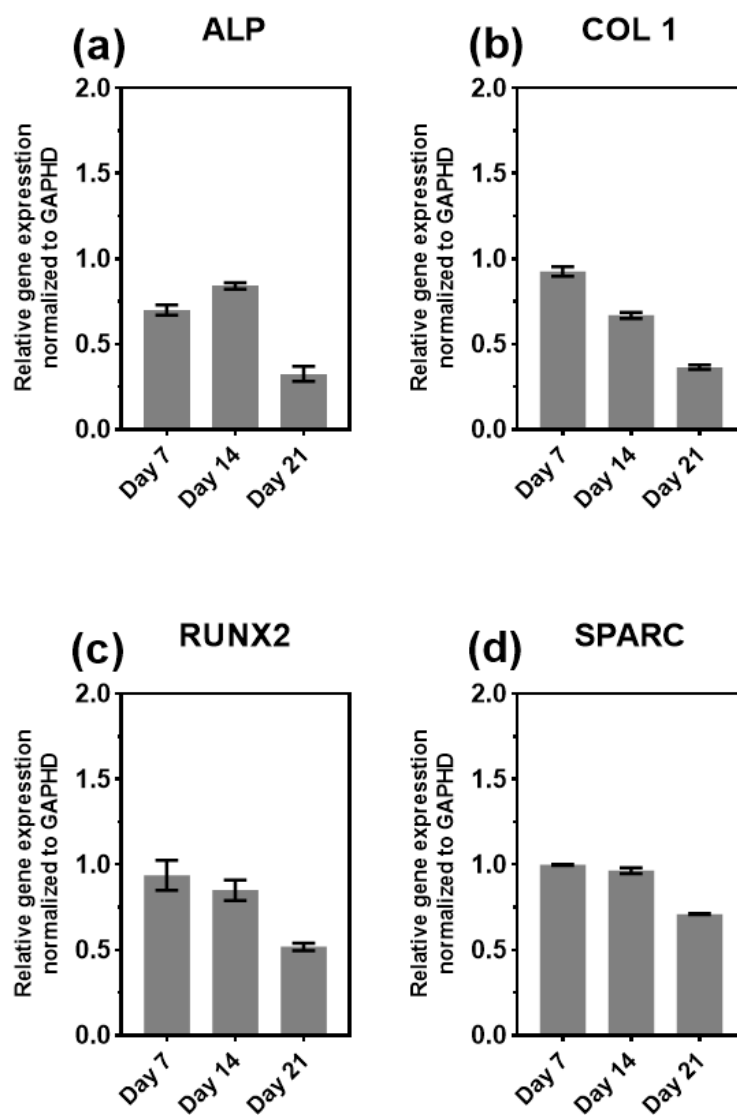

**Figure S1.** Relative gene expression of ALP (a), COL 1 (b), RUNX2 (c), and SPARC (d) of hMSCs on tissue culture plate (TCP) after culturing in osteogenic medium for day 7, 14, and 21. TCP with hMSCs was used as a reference group. GAPDH was used as a housekeeping gene.
